# Supplementary material for: Nanoparticle-Decorated Ultrathin La2O3 Nanosheets as an Efficient Electrocatalysis for Oxygen Evolution Reactions
Source: PubMed Central journal article supplement (PMC7770806; doi:10.1007/s40820-020-0387-5), 2020-02-14
Supplement: 40820_2020_387_MOESM1_ESM.pdf [file 40820_2020_387_MOESM1_ESM.pdf]

Supporting Information for

## Nanoparticle-Decorated Ultrathin $\text{La}_2\text{O}_3$ Nanosheets as An Efficient Electrocatalysis for Oxygen Evolution Reactions

Guangyuan Yan<sup>1,2</sup>, Yizhan Wang<sup>1</sup>, Ziyi Zhang<sup>1</sup>, Yutao Dong<sup>1</sup>, Jingyu Wang<sup>1</sup>, Corey Carlos<sup>1</sup>, Pu Zhang<sup>3</sup>, Zhiqiang Cao<sup>2,\*</sup>, Yanchao Mao<sup>3,\*</sup>, Xudong Wang<sup>1,\*</sup>

<sup>1</sup>Department of Material Sciences and Engineering, University of Wisconsin-Madison, Madison, WI 53706, USA

<sup>2</sup>Key Laboratory of Solidification Control and Digital Preparation Technology (Liaoning Province), School of Materials Science and Engineering, Dalian University of Technology, Dalian 116024, People's Republic of China

<sup>3</sup>MOE Key Laboratory of Materials Physics, School of Physics, Zhengzhou University, Zhengzhou 450001, People's Republic of China

\*Corresponding authors. E-mail: [xudong.wang@wisc.edu](mailto:xudong.wang@wisc.edu) (Xudong Wang); [caoqz@dlut.edu.cn](mailto:caoqz@dlut.edu.cn) (Zhiqiang Cao); [ymao@zzu.edu.cn](mailto:ymao@zzu.edu.cn) (Yanchao Mao)

### Supplementary Figures

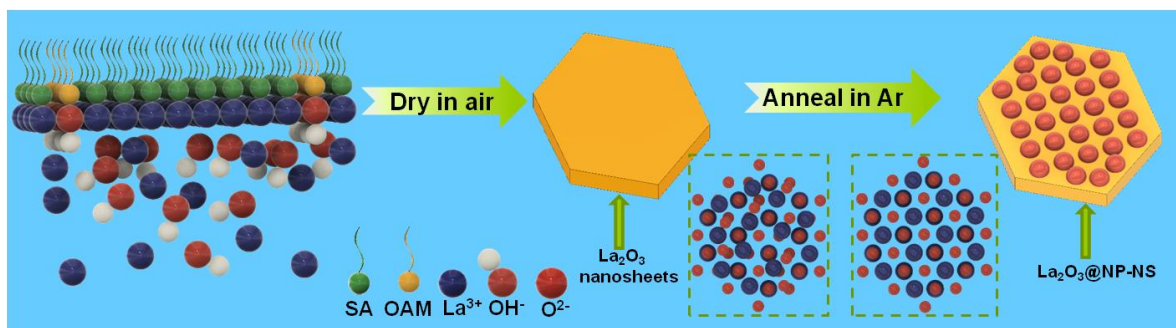

**Fig. S1** Schematic of synthesis process of  $\text{La}_2\text{O}_3$ @NP-NS

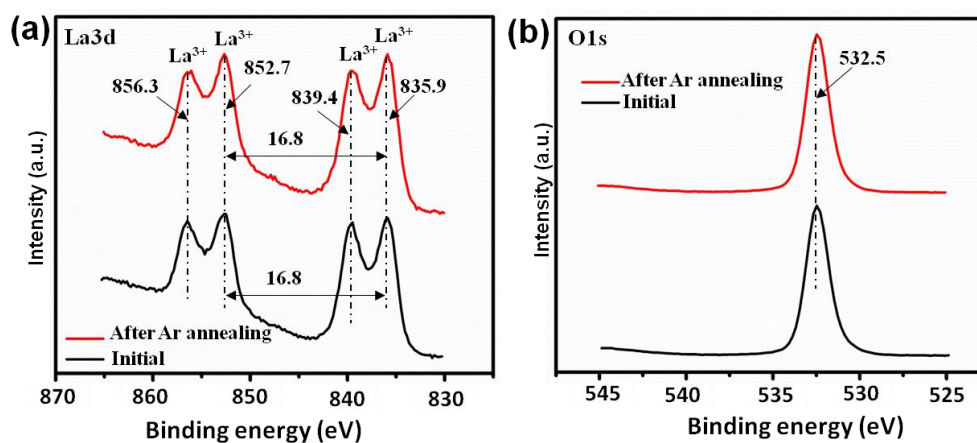

**Fig. S2 a** La 3d and **b** O 1s XPS spectrum of 2.27 nm  $\text{La}_2\text{O}_3$ @NP-NS before and after Ar annealing

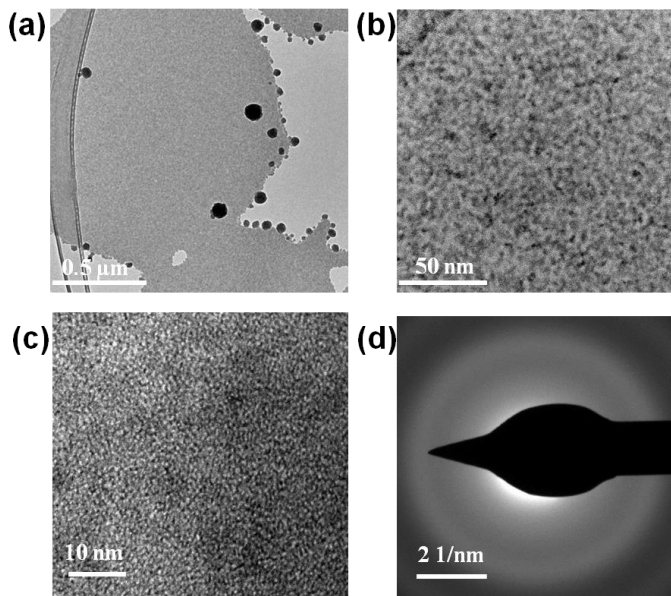

**Fig. S3** Structural characterization of  $\text{La}_2\text{O}_3$  nanosheets before annealing. **a** TEM image of hexagonal  $\text{La}_2\text{O}_3$  nanosheets. **b-c** HRTEM images of  $\text{La}_2\text{O}_3$  nanosheets. **d** Corresponding SAED pattern of  $\text{La}_2\text{O}_3$  nanosheet

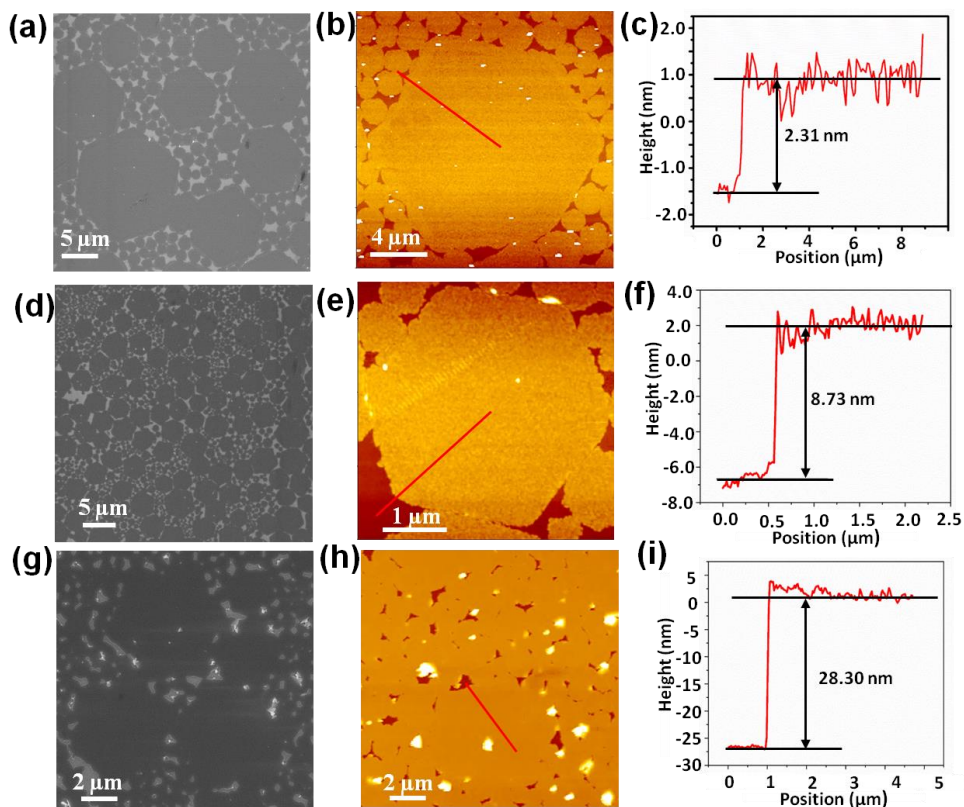

**Fig. S4**  $\text{La}_2\text{O}_3$  nanosheets grown for 5 h at **a-c** 45 °C, **d-f** 60 °C, **g-i** before annealing: **a, d, g** SEM images, **b, e, h** AFM topography images, and **c, f, i** height profiles along the red dashed lines in corresponding AFM topography images

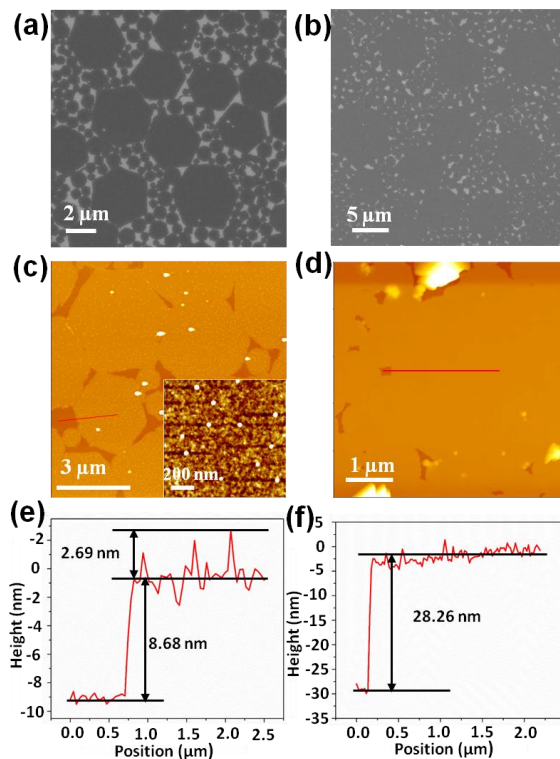

**Fig. S5** Morphology and thickness of 8.68-nm  $\text{La}_2\text{O}_3$ @NP-NS and 28.26-nm  $\text{La}_2\text{O}_3$  nanosheets after Ar annealing. **a–b** SEM images, **c–d** AFM topography images, inset in **c** is high-magnification AFM topography scan of nanosheets, and **e–f** height profiles along the red dashed lines in corresponding AFM topography images of nanosheets grown for 5 hours at **a, c, e** 60 °C, **b, d, f** 80 °C

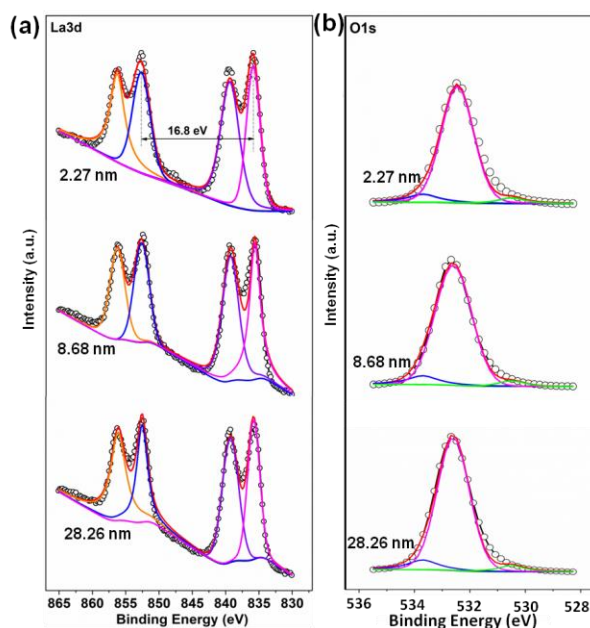

**Fig. S6** Fitted XPS spectrum of characteristic X-ray peak of La 3d **a** and O1s **b** from 2.27-nm  $\text{La}_2\text{O}_3$ @NP-NS, 8.68-nm  $\text{La}_2\text{O}_3$ @NP-NS, and 28.26-nm thick  $\text{La}_2\text{O}_3$  nanosheets

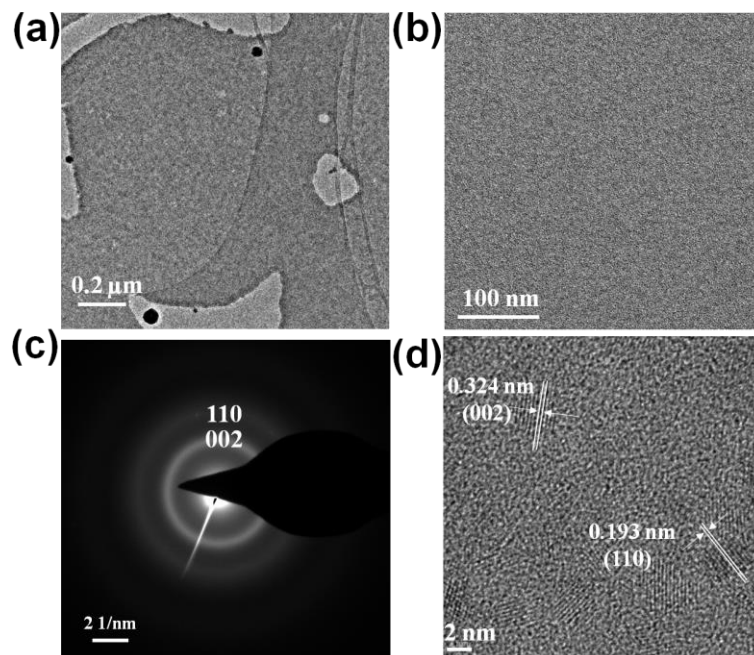

**Fig. S7** Structural characterization of 28.26-nm  $\text{La}_2\text{O}_3$ . **a** Low-magnification TEM image of hexagonal  $\text{La}_2\text{O}_3$  nanosheet on a holey carbon TEM grid. **b** High-magnification TEM image. **c** SAED pattern. **d** HRTEM image

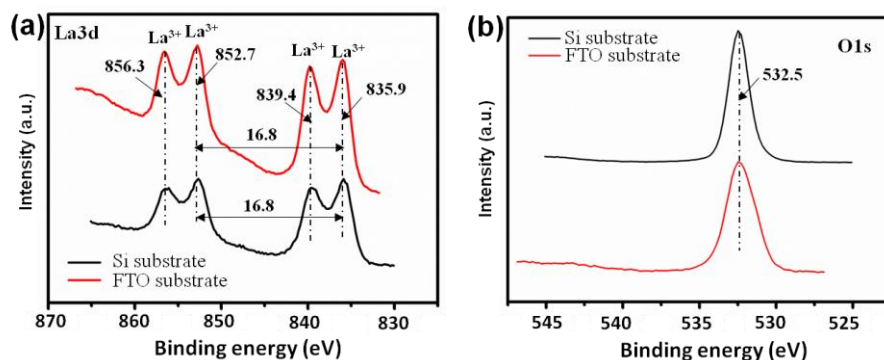

**Fig. S8 a** La 3d and **b** O 1s XPS spectrum of 2.27-nm  $\text{La}_2\text{O}_3$ @NP-NS on FTO and Si substrate

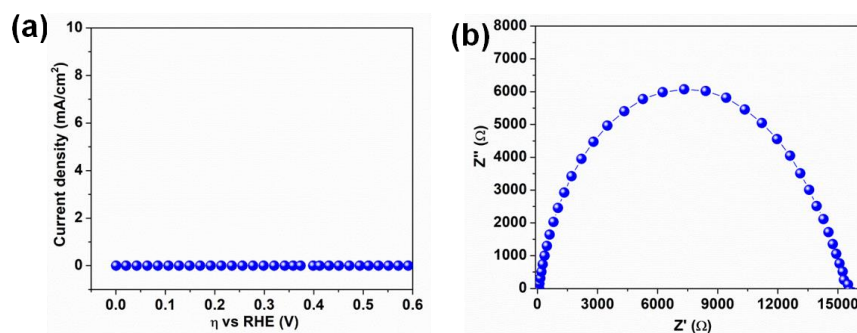

**Fig. S9 a** OER polarization curves of FTO substrate measured in 1 M NaOH aqueous. **b** Nyquist plots of FTO substrate measured in 1 M NaOH solution at a potential of 310 mV vs. RHE

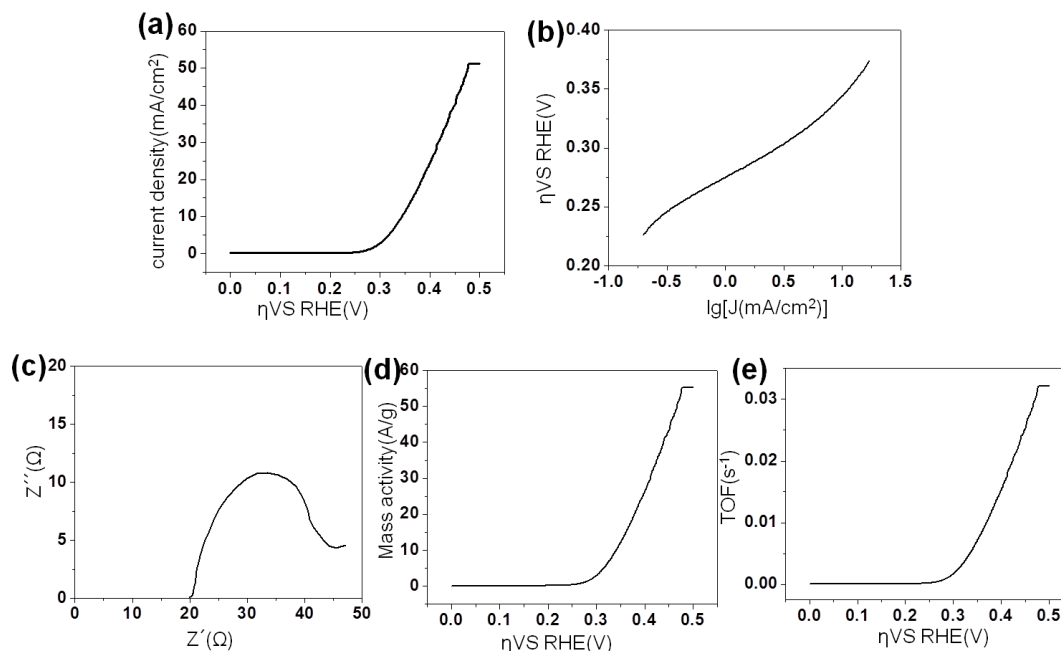

**Fig. S10** Electrocatalytic OER performance of commercial  $\text{IrO}_2$  powder. **a** OER polarization curves measured in 1 M NaOH solution. **b** Tafel plots. **c** Nyquist plots measured in 1 M NaOH solution at a potential of 310 mV vs. RHE. **d** Mass activity determined from current density as a function of  $\eta$ . **e** TOF determined from  $j$  as a function of  $\eta$

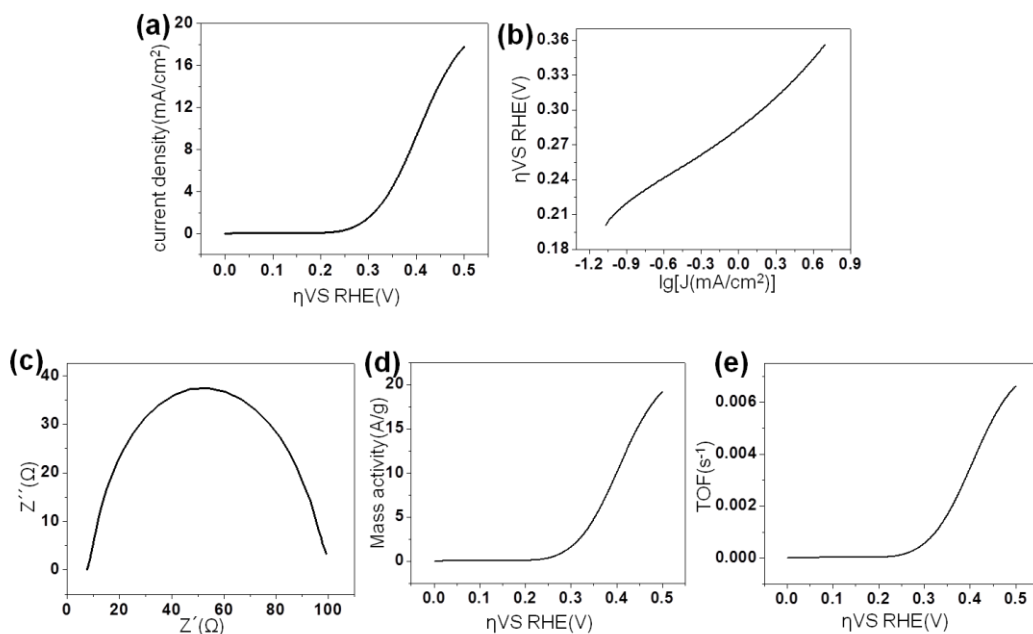

**Fig. S11** Electrocatalytic OER performance of commercial  $\text{RuO}_2$  powder. **a** OER polarization curves measured in 1 M NaOH solution. **b** Tafel plots. **c** Nyquist plots measured in 1 M NaOH solution at a potential of 310 mV vs. RHE. **d** Mass activity determined from current density as a function of  $\eta$ . **e** TOF determined from  $j$  as a function of  $\eta$

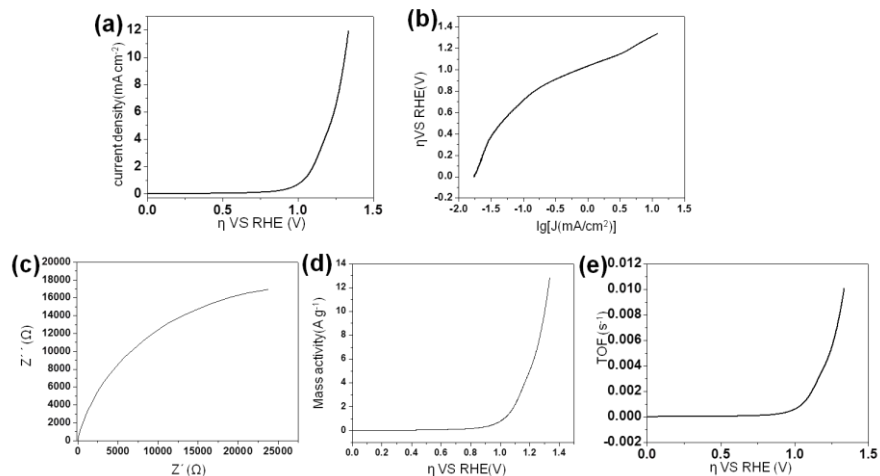

**Fig. S12** **a** OER polarization curves measured in 1 M NaOH solution. **b** Tafel plots. **c** Nyquist plots measured in 1 M NaOH solution at a potential of 310 mV vs. RHE. **d** Mass activity determined from current density as a function of  $\eta$ . **e** TOF determined from  $j$  as a function of  $\eta$

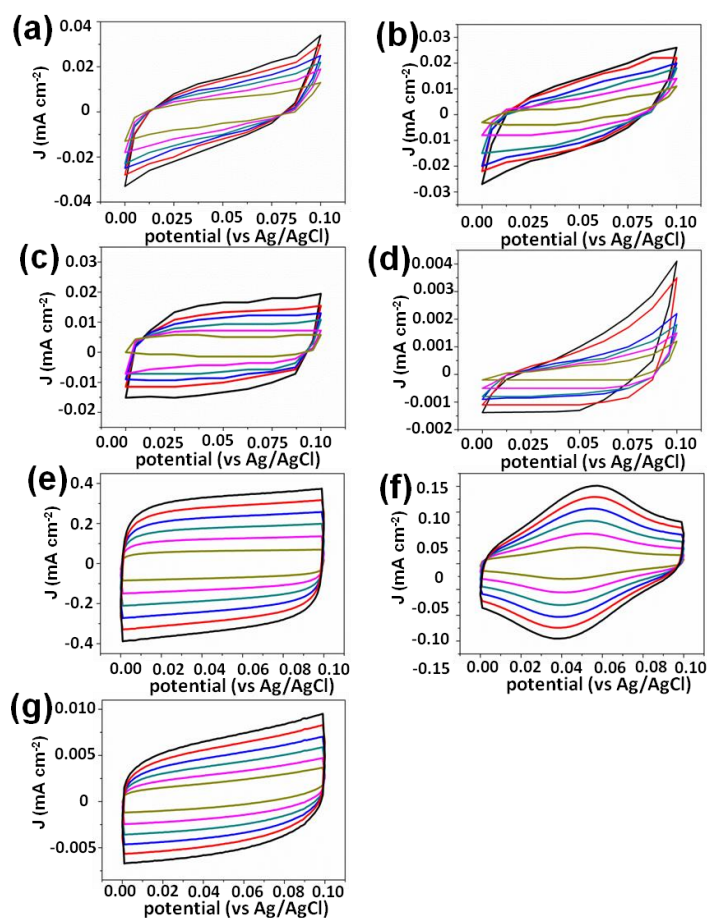

**Fig. S13** Cyclic voltammograms curves of of **a** 2.27-nm  $\text{La}_2\text{O}_3$ @NP-NS, **b** 8.68-nm  $\text{La}_2\text{O}_3$ @NP-NS and **c** 28.26 nm thick  $\text{La}_2\text{O}_3$  nanosheets, **d** ILE synthesized  $\text{La}_2\text{O}_3$  NPs, commercial **e**  $\text{IrO}_2$ , **f**  $\text{RuO}_2$ , and **g**  $\text{La}_2\text{O}_3$  powder. The scan rates were varied from 10 to 60  $\text{mV s}^{-1}$

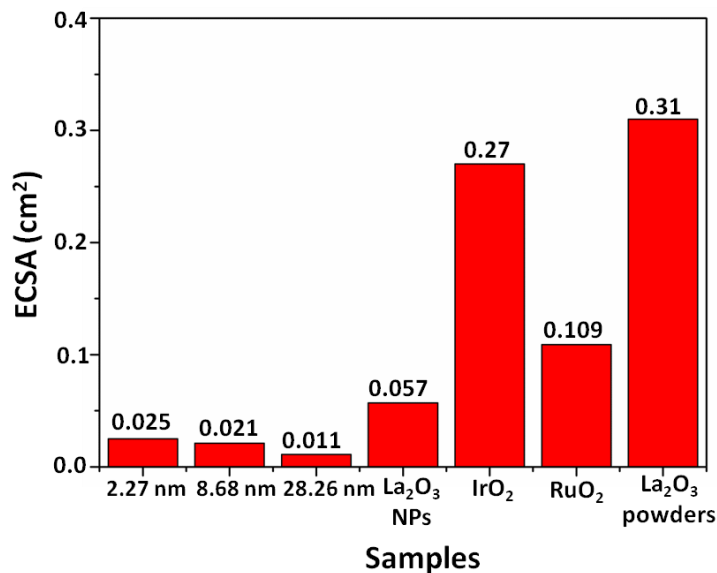

**Fig. S14** ECSA of of **a** 2.27-nm La<sub>2</sub>O<sub>3</sub>@NP-NS, **b** 8.68-nm La<sub>2</sub>O<sub>3</sub>@NP-NS, and **c** 28.26-nm La<sub>2</sub>O<sub>3</sub> nanosheets, **d** ILE synthesized La<sub>2</sub>O<sub>3</sub> NPs, commercial **e** IrO<sub>2</sub>, **f** RuO<sub>2</sub>, and **g** La<sub>2</sub>O<sub>3</sub> powder

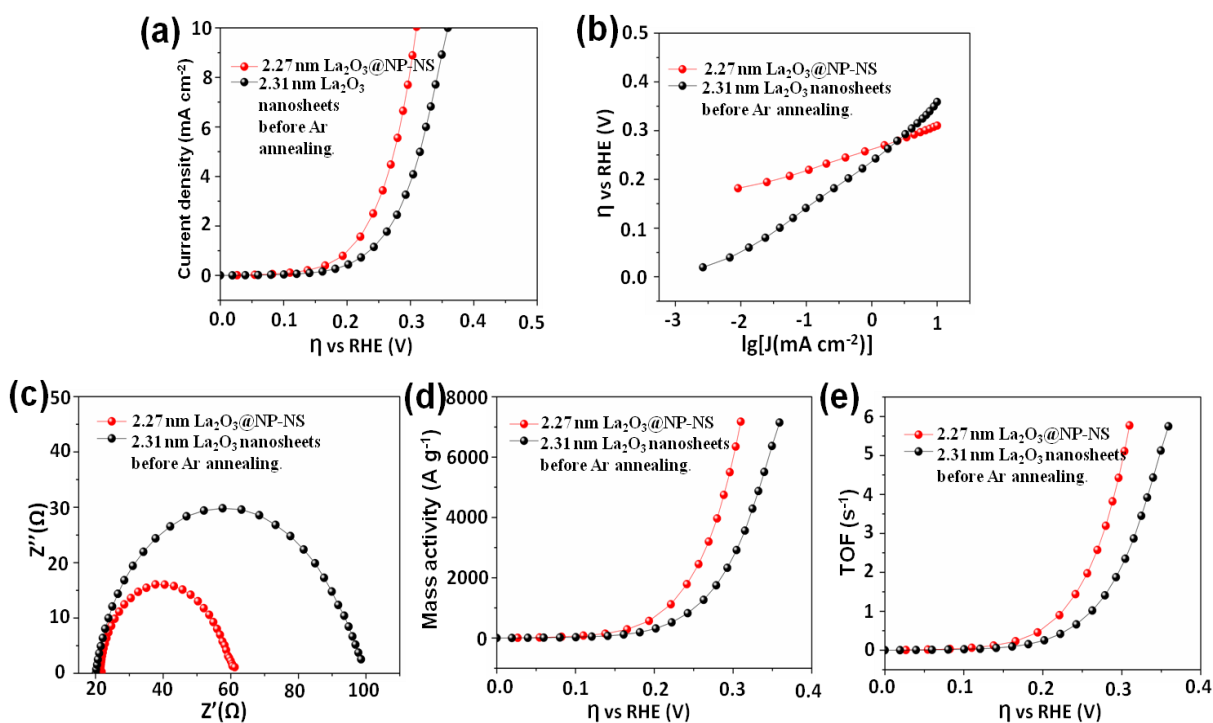

**Fig. S15** Electrocatalytic OER performance comparison of 2.27 nm La<sub>2</sub>O<sub>3</sub>@NP-NS and La<sub>2</sub>O<sub>3</sub> nanosheets before Ar annealing. **a**) OER polarization curves measured in 1 M NaOH solution. **b**) Tafel plots. **c**) Nyquist plots measured in 1 M NaOH solution at a potential of 310 mV vs. RHE. **d**) Mass activity determined from current density as a function of  $\eta$ . **e**) TOF determined from  $j$  as a function of  $\eta$

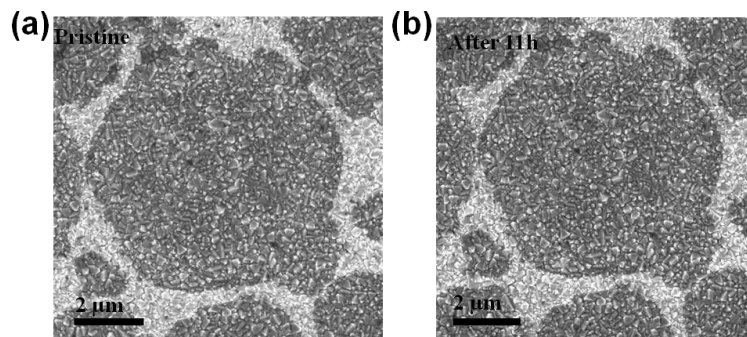

**Fig. S16** SEM images of 2.27 nm  $\text{La}_2\text{O}_3$ @NP-NS on FTO substrate before **a** and after **b** 11-hour OER

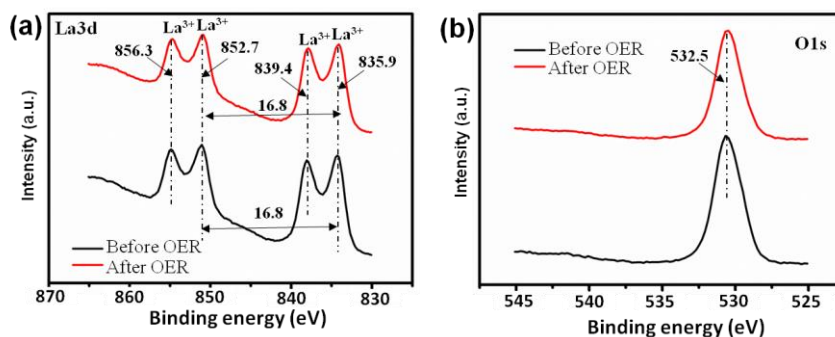

**Fig. S17 a** La 3d and **b** O 1s XPS spectrum of 2.27 nm  $\text{La}_2\text{O}_3$ @NP-NS on FTO substrate before and after OER measurement

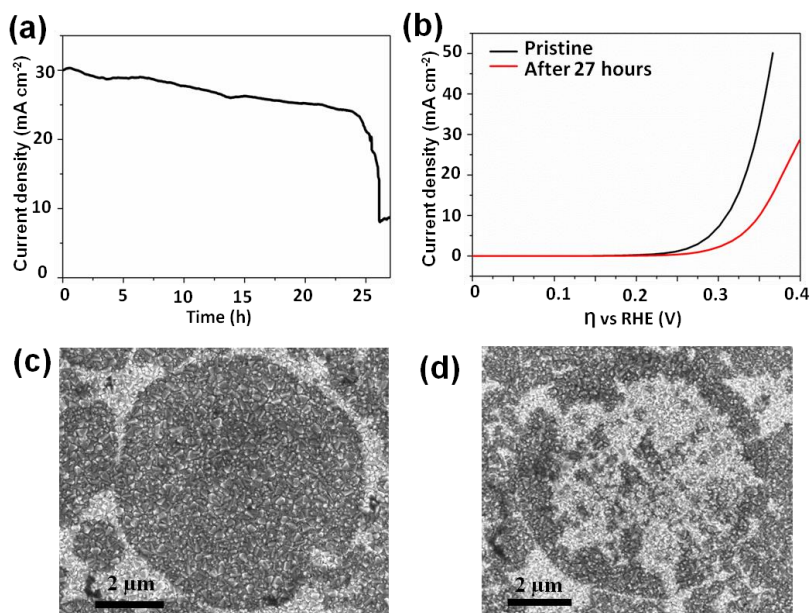

**Fig. S18 a** Current density measured at  $\eta = 345$  mV (vs. RHE) as a function of time. **b** OER polarization curves of 2.27-nm  $\text{La}_2\text{O}_3$ @NP-NS before and after 27-hour OER. SEM images of 2.27-nm  $\text{La}_2\text{O}_3$ @NP-NS on FTO substrate before (c) and after (d) 27-hour OER



**Table S1** OER performance comparison between this work and other catalysts

| Catalysts                                        | Over potential (mV)<br>@ 10 mA cm <sup>-2</sup> | Mass loading<br>(mg cm <sup>-2</sup> ) | Mass activity (A<br>g <sup>-1</sup> )<br>@310 mV | TOF (s <sup>-1</sup> )<br>@310 mV | Refs.     |
|--------------------------------------------------|-------------------------------------------------|----------------------------------------|--------------------------------------------------|-----------------------------------|-----------|
| 2.27-nm<br>La <sub>2</sub> O <sub>3</sub> @NP-NS | 310                                             | 0.0014                                 | 6666.7                                           | 5.79                              | This work |
| CoFe-LDHs                                        | 310                                             | 0.2                                    | 5.0                                              | -                                 | [S1]      |
| NiFe MOFs                                        | 300                                             | -                                      | < 3100                                           | -                                 | [S2]      |
| Co <sub>2</sub> (OH) <sub>3</sub> Cl             | 270                                             | 0.105                                  | 286.4                                            | 0.73                              | [S3]      |
| Co <sub>3</sub> O <sub>4</sub> /CeO <sub>2</sub> | 270                                             | -                                      | -                                                | < 0.25                            | [S4]      |
| Co <sub>3</sub> O <sub>4</sub>                   | 376                                             | -                                      | -                                                | < 0.39                            | [S5]      |
| NiFeCr                                           | 342                                             | -                                      | -                                                | -                                 | [S6]      |
| CoFe LDHs                                        | 324                                             | 0.02                                   | -                                                | -                                 | [S7]      |
| NiO nanoparticle                                 | 335                                             | 0.02                                   | 72.5                                             | 0.0018                            | [S8]      |
| Ni <sub>0.81</sub> Fe <sub>0.19</sub> O          | 310                                             | -                                      | -                                                | <0.26                             | [S9]      |
| Co <sub>3</sub> O <sub>4</sub>                   | 339                                             | 1.5                                    | 3.33                                             | -                                 | [S10]     |
| Ni@NC                                            | 390                                             | 0.4                                    | 2.5                                              | 0.136                             | [S11]     |
| Co <sub>3</sub> O <sub>4</sub> NW/CC             | 320                                             | 0.82                                   | 9.76                                             | -                                 | [S12]     |
| Ni <sub>2</sub> P<br>nanoparticles               | 290                                             | 0.14                                   | 142.9                                            | -                                 | [S13]     |
| nNiFe LDH/NGF                                    | 337                                             | 0.25                                   | -                                                | -                                 | [S14]     |
| IrO <sub>2</sub>                                 | 338                                             | 0.21                                   | 12.4                                             | 0.022                             | [S15]     |
| Mn Oxide                                         | 540                                             | 0.028                                  | 71.4                                             | -                                 | [S16]     |

### Supplementary References

- [S1] P. Li, M.Y. Wang, X.X. Duan, L.R. Zheng, X.P. Cheng et al., Boosting oxygen evolution of single-atomic ruthenium through electronic coupling with cobalt-iron layered double hydroxides. *Nat. Commun.* **10**, 1711 (2019). <https://doi.org/10.1038/s41467-019-09666-0>
- [S2] W.R. Cheng, X. Zhao, H. Su, F. Tang, W. Che et al., Lattice-strained metal-organic-framework arrays for bifunctional oxygen electrocatalysis. *Nat. Energy* **4**, 115-112 (2019). <https://doi.org/10.1038/s41560-018-0308-8>
- [S3] H.L. Jiang, Q. He, X.Y. Li, X.Z. Su, Y.K. Zhang et al., Tracking structural self-reconstruction and identifying true active sites toward cobalt oxychloride precatalyst of oxygen evolution reaction. *Adv. Mater.* **31**, 1805127 (2019). <https://doi.org/10.1002/adma.201805127>
- [S4] Y. Liu, C. Ma, Q. H. Zhang, W. Wang, P. F. Pan et al., 2D electron gas and oxygen vacancy induced high oxygen evolution performances for advanced Co<sub>3</sub>O<sub>4</sub>/CeO<sub>2</sub> nanohybrids. *Adv. Mater.* **31**, 1900062 (2019). <https://doi.org/10.1002/adma.201900062>
- [S5] R. R. Zhang, Y. C. Zhang, L. Pan, G. Q. Shen, N. Mahmood et al., Engineering cobalt defects in cobalt oxide for highly efficient electrocatalytic oxygen evolution. *ACS Catal.* **8**, 3803-3811 (2018). <https://doi.org/10.1021/acscatal.8b01046>
- [S6] Y. Yang, L. Dang, M.J. Shearer, H.Y. Sheng, W.J. Li, et al., Highly active trimetallic nifecr layered double hydroxide electrocatalysts for oxygen evolution reaction. *Adv. Energy Mater.* **8**, 1703189 (2018). <https://doi.org/10.1002/aenm.201703189>
- [S7] Y.Y. Wang, C. Xie, Z.Y. Zhang, D.D. Liu, R. Chen et al., In situ exfoliated, n-doped, and edge-rich ultrathin layered double hydroxides nanosheets for oxygen evolution reaction.

- Adv. Funct. Mater. **28**, 1703363 (2018). <https://doi.org/10.1002/adfm.201703363>
- [S8] K. Fominykh, G.C. Tok, P. Zeller, H. Hajiyani, T. Miller et al., Rock salt Ni/Co oxides with unusual nanoscale-stabilized composition as water splitting electrocatalysts. Adv. Funct. Mater. **27**, 1605121 (2017). <https://doi.org/10.1002/adfm.201605121>
- [S9] A.C. Pebley, E. Decolvenaere, T.M. Pollocka, M.J. Gordon, Oxygen evolution on Fe-doped NiO electrocatalysts deposited via microplasma. Nanoscale **9**, 15070 (2017). <https://doi.org/10.1039/C7NR04302C>
- [S10] Y. Zhang, B. Ouyang, J. Xu, G. Jia, S. Chen et al., Rapid synthesis of cobalt nitride nanowires: highly efficient and low-cost catalysts for oxygen evolution. Angew. Chem. Int. Ed. **55**, 8670-8674 (2016). <https://doi.org/10.1002/anie.201604372>
- [S11] J. Ren, M. Antonietti, T. P. Fellingner, Efficient water splitting using a simple Ni/N/C paper electrocatalyst. Adv. Energy Mater. **5**, 1401660 (2015). <https://doi.org/10.1002/aenm.201401660>
- [S12] P. Chen, K. Xu, Z. Fang, Y. Tong, J. Wu et al., Metallic Co<sub>4</sub>N porous nanowire arrays activated by surface oxidation as electrocatalysts for the oxygen evolution reaction. Angew. Chem. Int. Ed. **54**, 14710-14714 (2015). <https://doi.org/10.1002/anie.201506480>
- [S13] L.A. Stern, L. Feng, F. Song, X. Hu, Ni<sub>2</sub>P as a Janus catalyst for water splitting: the oxygen evolution activity of Ni<sub>2</sub>P nanoparticles. Energy Environ. Sci. **8**, 2347-2351 (2015). <https://doi.org/10.1039/C5EE01155H>
- [S14] C. Tang, H.S. Wang, H.F. Wang, Q. Zhang, G.L. Tian et al., Spatially confined hybridization of nanometer-sized NiFe hydroxides into nitrogen-doped graphene frameworks leading to superior oxygen evolution reactivity. Adv. Mater. **27**, 4516-4522 (2015). <https://doi.org/10.1002/adma.201501901>
- [S15] F. Song, X. Hu, Exfoliation of layered double hydroxides for enhanced oxygen evolution catalysis. Nat. Commun. **5**, 4477 (2014). <https://doi.org/10.1038/ncomms5477>
- [S16] Y. Li, P. Hasin, Y. Wu, Ni<sub>x</sub>Co<sub>3-x</sub>O<sub>4</sub> Nanowire arrays for electrocatalytic oxygen evolution. Adv. Mater. **22**, 1926-1929 (2010). <https://doi.org/10.1002/adma.200903896>
